# Supplementary material for: In vitro activity of Camellia sinensis (green tea) against trophozoites and cysts of Acanthamoeba castellanii
Source: PubMed Central journal article supplement (PMC7281304; doi:10.1016/j.ijpddr.2020.05.001), 2020-06-02

**12 h**

**48 h**

**72 h**

**Positive control**

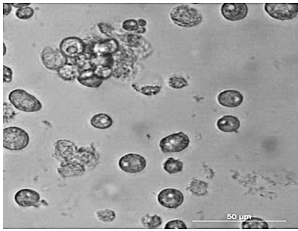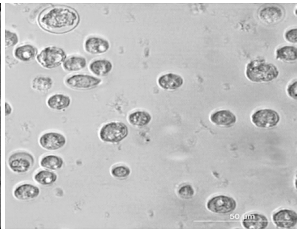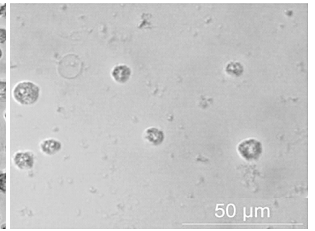

**Negative Control**

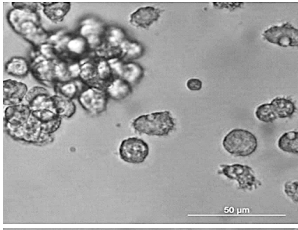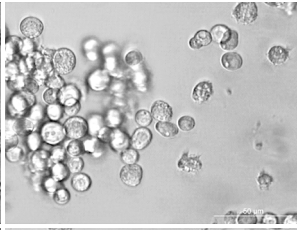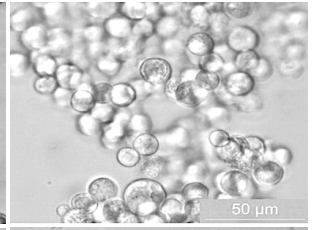

**25%**

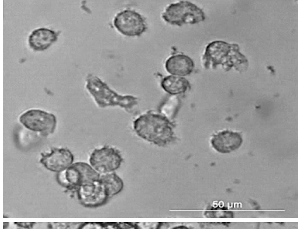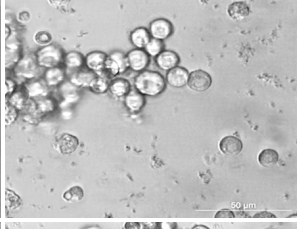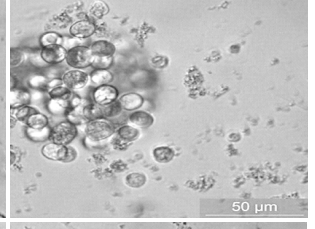

**50%**

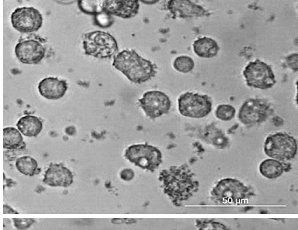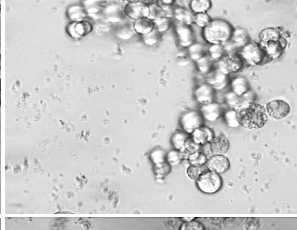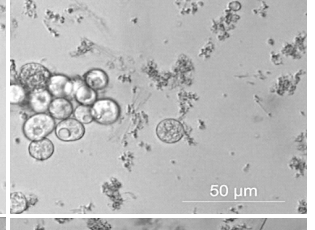

**75%**

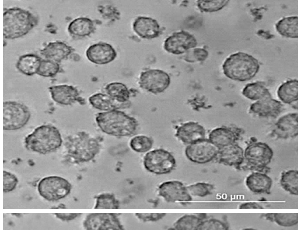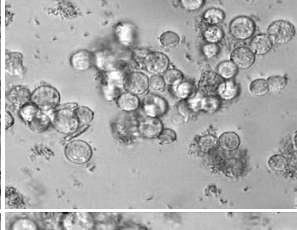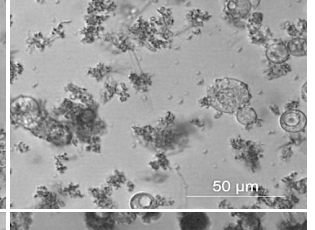

**100%**

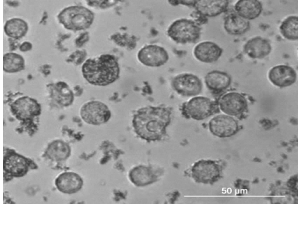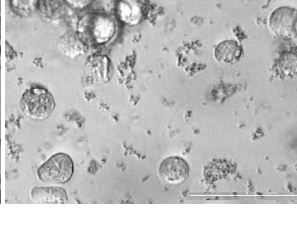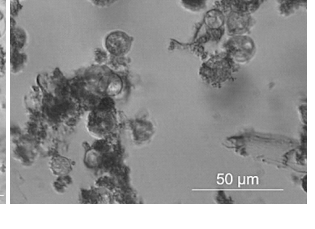

Supplement: mmc3.pdf [file mmc3.pdf]
