# Supplementary material for: In vitro activity of Camellia sinensis (green tea) against trophozoites and cysts of Acanthamoeba castellanii
Source: PubMed Central journal article supplement (PMC7281304; doi:10.1016/j.ijpddr.2020.05.001), 2020-06-02

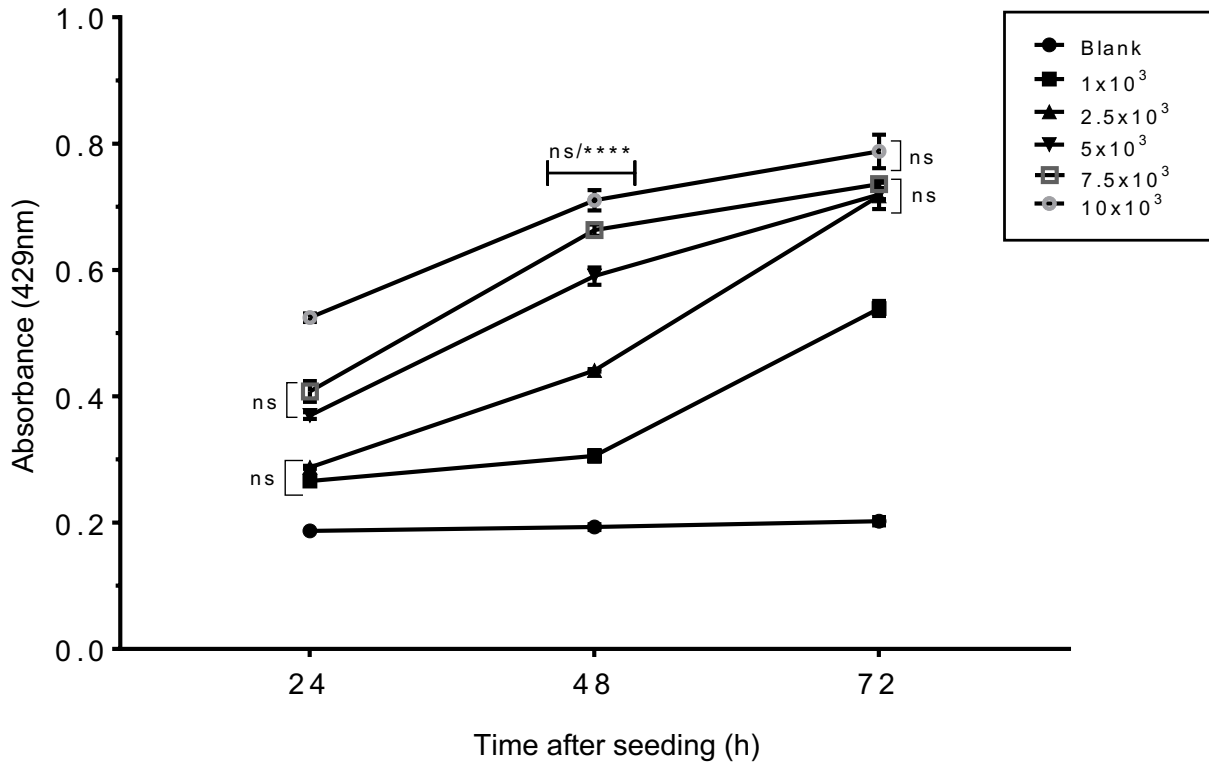

Supplement: mmc1.pdf [file mmc1.pdf]
