# Supplementary material for: In vitro activity of Camellia sinensis (green tea) against trophozoites and cysts of Acanthamoeba castellanii
Source: PubMed Central journal article supplement (PMC7281304; doi:10.1016/j.ijpddr.2020.05.001), 2020-06-02

**24 h****48 h****72 h****Control**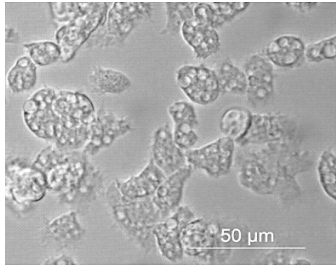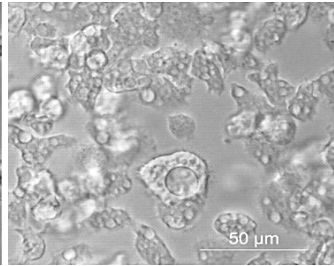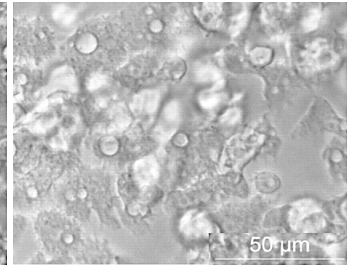**25%**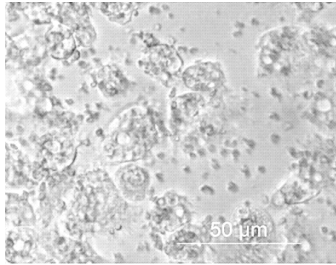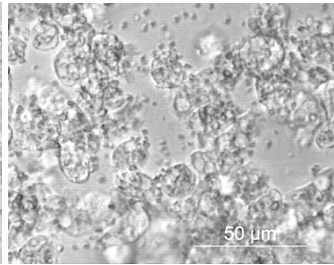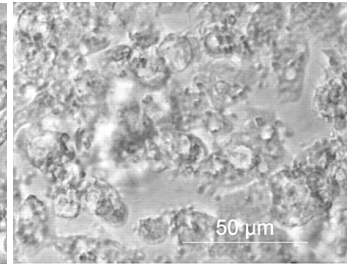**50%**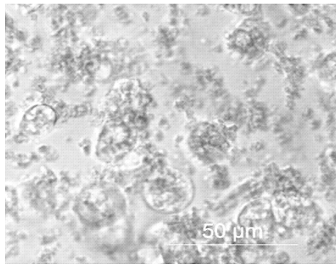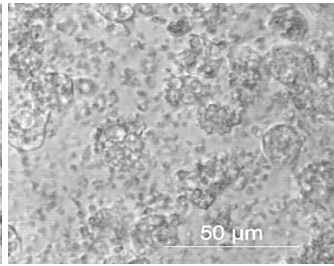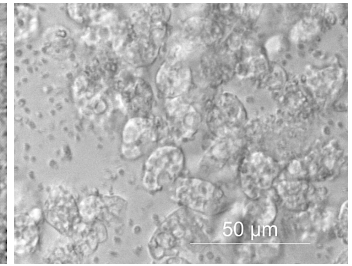**75%**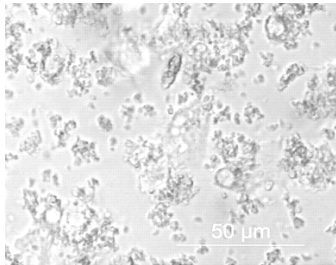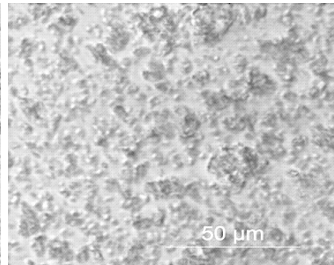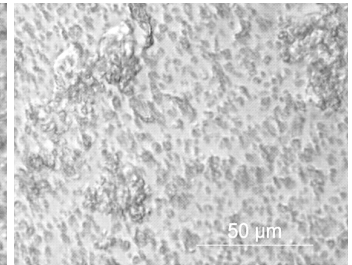**100%**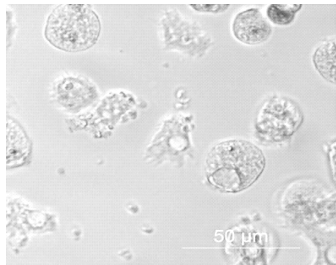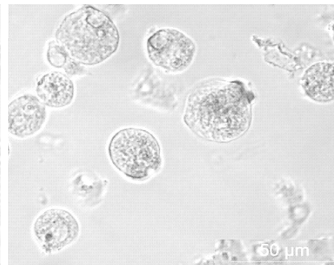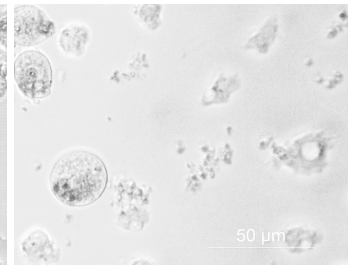

Supplement: mmc2.pdf [file mmc2.pdf]
